# Supplementary material for: Formaldehyde sensing mechanism of SnO2 nanowires grown on-chip by sputtering techniques
Source: Royal Society of Chemistry journal article supplement (doi:10.1039/c5ra26105h), 2016-01-01

# Supporting Information

## **Formaldehyde sensing mechanism of SnO<sub>2</sub> nanowires grown on chip by sputtering techniques**

I. Castro-Hurtado<sup>a,b</sup>, J. Gonzalez-Chávarri<sup>a,b</sup>, S. Morandi<sup>c</sup>, J. Samà<sup>d</sup>, A. Romano-Rodríguez<sup>d</sup>, Enrique Castaño<sup>a,b</sup>, G. G<sup>a</sup> Mandayo<sup>a,b</sup>,

<sup>a</sup> Ceit and Tecnun (University of Navarra)

Paseo Manuel Lardizabal 15, 20018 San Sebastián, Spain.

<sup>b</sup> CIC microGUNE, Goiruz Kalea 9 Polo Innovación Garaia, 20500

Arrasate-Mondragón, Spain

<sup>c</sup> Dipartimento di Chimica and NIS Inter-departmental Center, Università di Torino

Via P. Giuria 7, 10125 Torino, Italy.

<sup>d</sup> Universitat de Barcelona (UB), MIND-IN2UB-Dept. Electrònica

C/Martí i Franquès 1, 08028 Barcelona, Spain

*Corresponding author email: [ichurtado@ceit.es](mailto:ichurtado@ceit.es)*

# Supporting Information

**Figure S1**

Gas sensors were fabricated on alumina substrates (thickness:0.254 mm) The sensing device was prepared following a 3-step photolithography and sputtering (Edwards coating system E306A) process: at first step, a Pt heater was deposited on the back side of the alumina substrate by DC sputtering. This element is used to heat the sensing material to the required operating temperature for gas detection. Then, Pt interdigitated microelectrodes with a finger width of 50  $\mu\text{m}$  were deposited on the front side. The Pt sputtering process was carried out at  $2 \times 10^{-3}$  mbar for a deposition time of 30 minutes giving a thickness of 200 nm. In the third step, the sensing layer (area:  $1 \times 1 \text{ mm}^2$ ) was deposited over the Pt microelectrodes using a Sn (99.99%) and Au (99.99%) targets. In brief, a 1  $\mu\text{m}$ -thick Sn film was deposited by DC sputtering for a deposition time of 20 minutes and afterwards, an Au thin film (5 nm) was deposited by RF sputtering; RF power was maintained at 25 W for 1 minute. Finally, an annealing treatment was carried out in a PEO 601 ATV furnace with a constant flow of 400 sccm to grow the nanowires in-situ over the electrodes. A scheme of the fabrication process is shown in Figure S1 (Supporting Information).

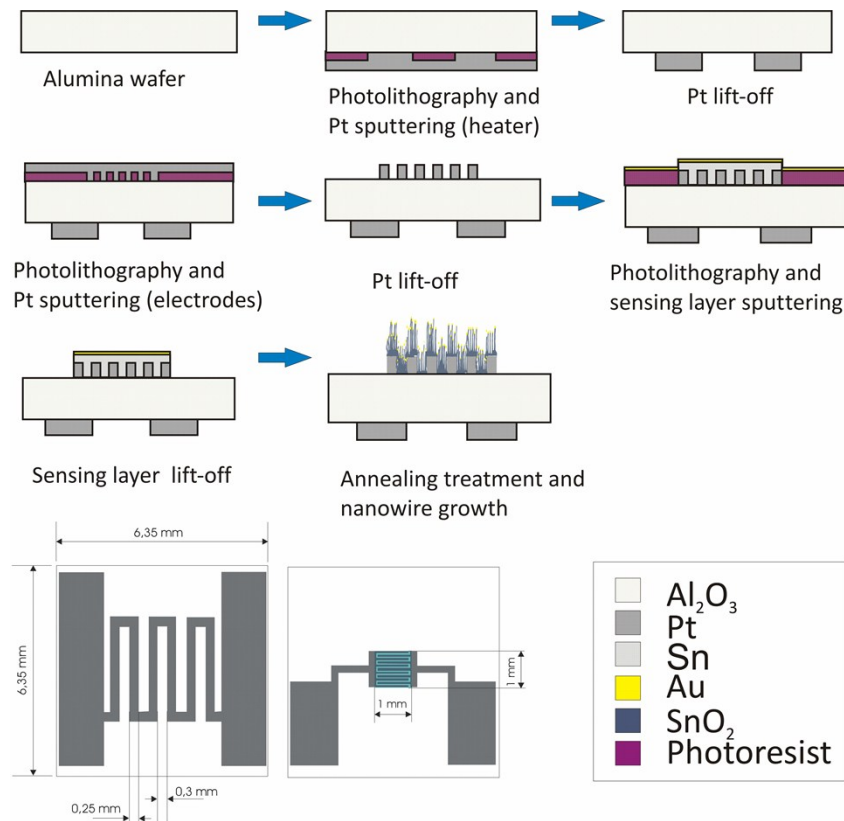

# Supporting Information

**Figure S2:** Scheme of the fabrication process of NWs by VLS mechanism employing CVD techniques. a) evaporation of Sn powder, b) transport to nucleation point, c) Sn atoms stuck to Au nanoparticle, d) oxidation and solidification.

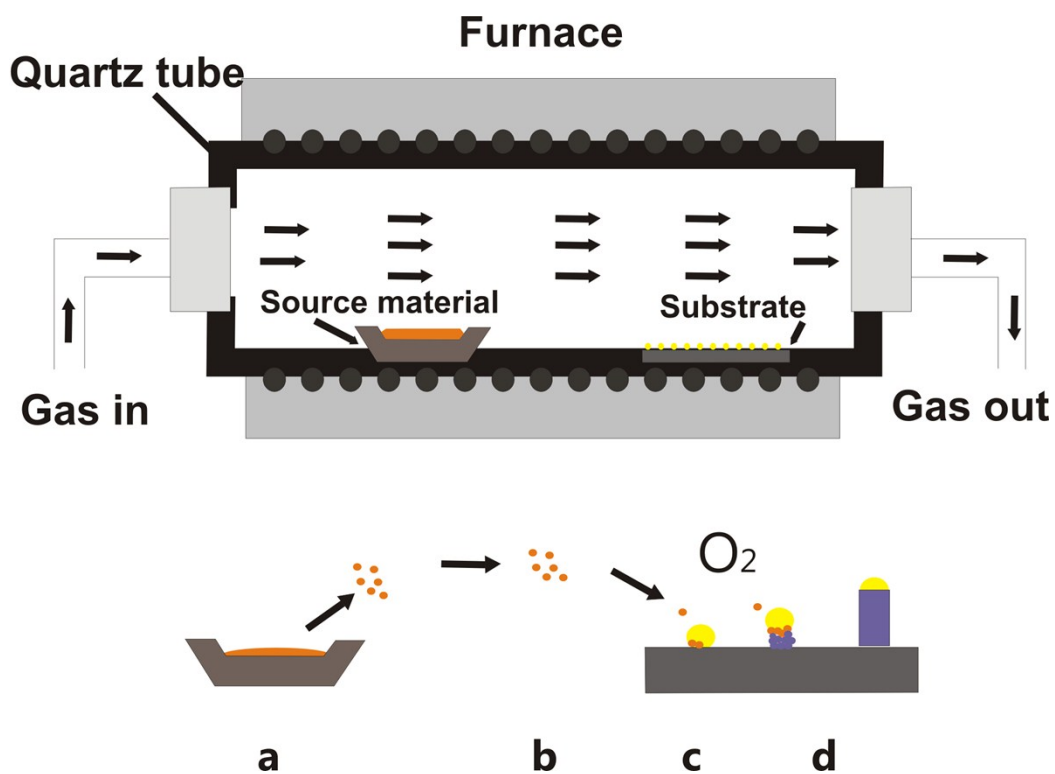

# Supporting Information

**Figure S3:** SEM micrographs of the nanowires grown in-situ over electrodes, showing a good and uniform coverage. a) Samples viewed at a 20 $\mu\text{m}$  scale and b) 2 $\mu\text{m}$  scale.

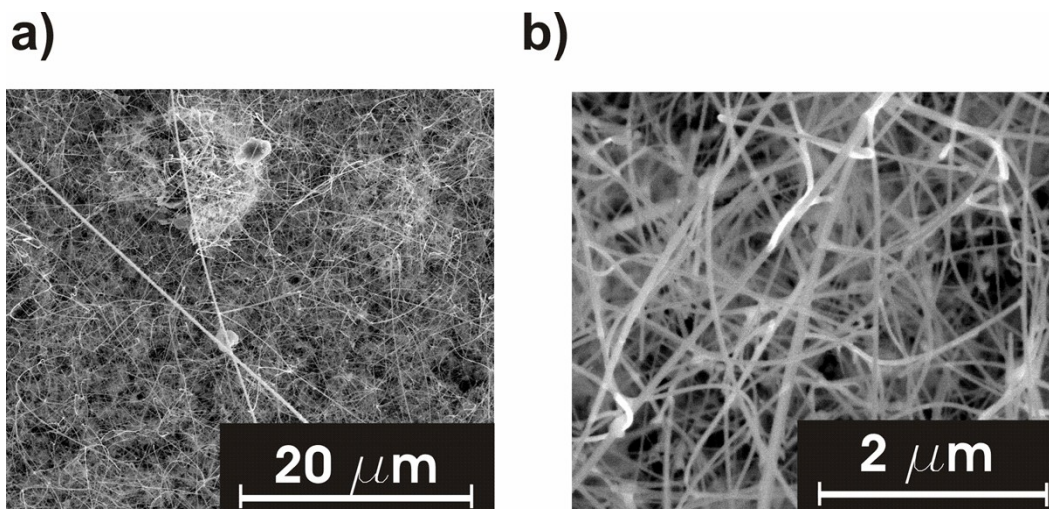

- **Figure S4:** Selectivity measurements of the in-situ grown  $\text{SnO}_2$  NWs gas sensors against  $\text{HCHO}$ ,  $\text{C}_6\text{H}_6$ ,  $\text{CO}_2$  and  $\text{NH}_3$ .

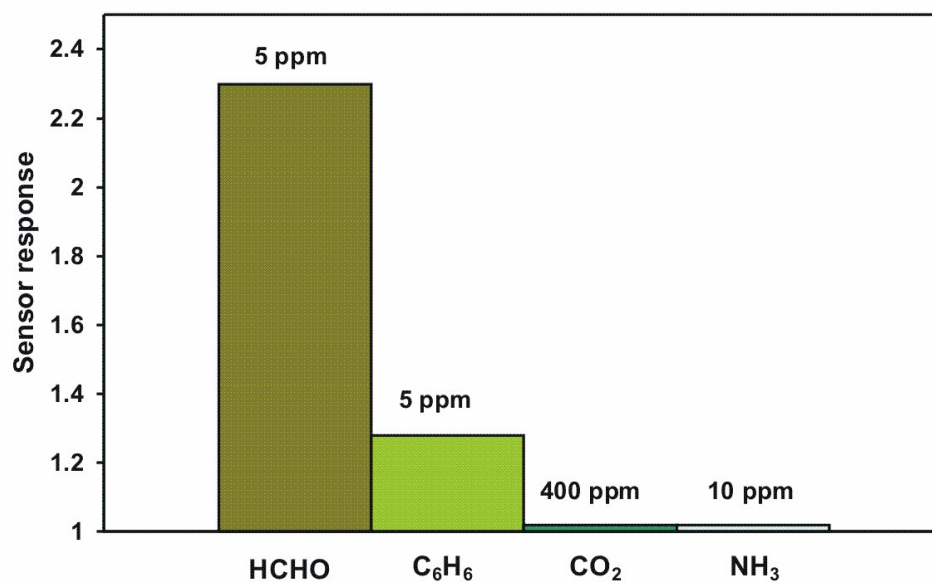

# Supporting Information

- **Figure S5:** Conductance transient response in air under fast temperature change. Starting temperature (260 °C) is changed abruptly to three different temperatures (233, 280 and 300 °C). This method, explained in detail in the work from Carotta et al, consists in evaluating the conductance transient response under a fast temperature change. Assuming that the potential energy barrier changes more slowly than the temperature of the sensor and free carrier concentration, the extrapolation of the curves to zero time gives the value of conductance when the sensor has the initial barrier but a changed temperature. From this analysis it is possible to estimate the constant  $G_0$  and the barrier energy at different temperatures.

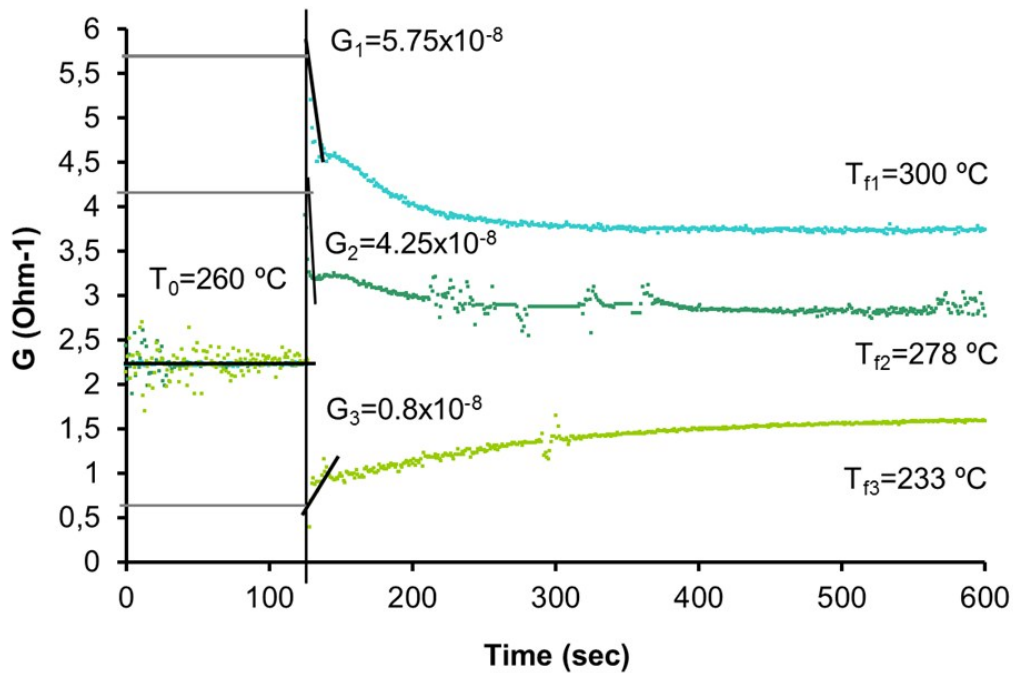

$$G = G_0 \exp\left(-\frac{eV_s(T)}{k_B T}\right)$$

# Supporting Information

- **Figure S6:** FT-IR spectrum in oxygen (black line in figure) and the spectrum in formaldehyde (red line) recorded at 350 °C. The blue line in the figure below is the difference spectrum reported in the manuscript.

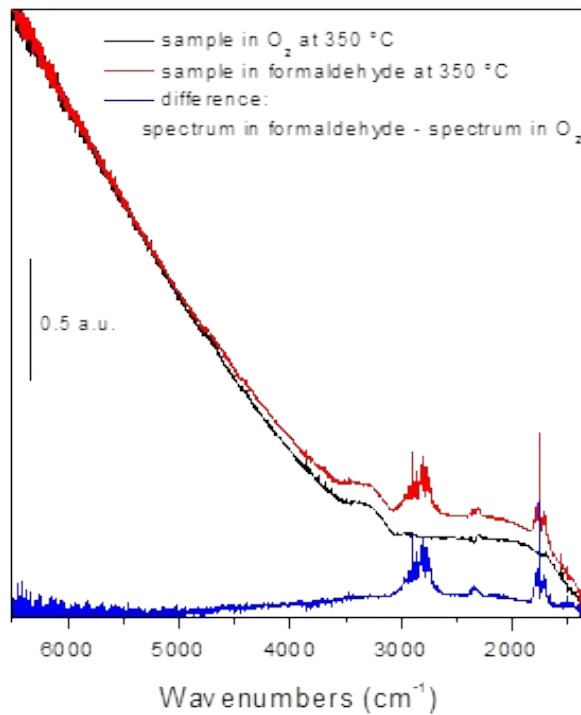

# Supporting Information

- **Figure S7:** I-V curves of samples measured with a 2450 Keithley Sourcemeter in a two probe mode at a voltage range of -5 to +5 V and temperatures between 200 and 300 °C.

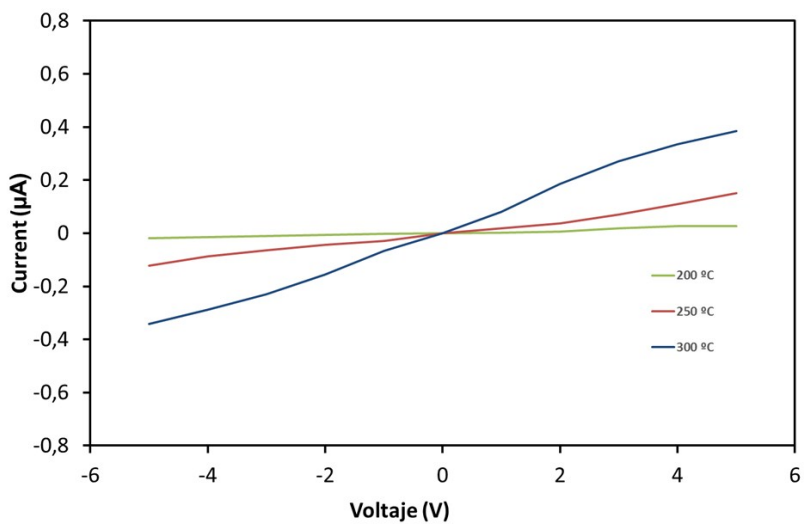

Supplement: c5ra26105h1.pdf [file c5ra26105h1.pdf]
